# Supplementary material
Source: PubMed Central journal article supplement (PMC8759350)
Supplement: bloodBLD2020005381-suppl1.pdf [file bloodBLD2020005381-suppl1.pdf]

## 1 **Supplemental Information**

### 2 **Supplemental Materials and Methods**

#### 3 **Treatment, sample preparation and next generation sequencing**

4 The backbone of the treatment regimen is identical for all patients treated according to the  
5 protocols NHL-BFM 95, LBL Registry, trial EURO-LB02 and NHL-BFM Registry 2012. All  
6 protocols are based on the most successful clinical trial for pediatric patients with  
7 lymphoblastic lymphoma, the trial NHL-BFM 90<sup>1</sup>. There were only minor changes in the  
8 subsequent protocols. The main difference between NHL-BFM 95 and subsequent  
9 protocols LBL Registry, EURO-LB 02 and NHL-BFM Registry 2012 are: i) the dose of E.  
10 coli asparaginase in induction which was 5,000 U/m<sup>2</sup> compared with 10,000 U/m<sup>2</sup> in  
11 subsequent protocols and ii) the recommendation of two additional doses of intrathecal  
12 methotrexate in induction for all patients independent of their CNS status at diagnosis.  
13 The vast majority of the treatment protocols was identical. The trial EURO-LB 02  
14 addressed two randomized questions<sup>2</sup>. Both questions could not be evaluated on  
15 confirmatory statistics due to the early stop of patient recruitment. Descriptive statistics  
16 did not show a difference in outcome according to randomization arm. The randomization  
17 results for randomized questions are detailed in the supplemental Table 1.  
18 Genomic DNA from primary (n=122) and relapse samples (n=9) was isolated from fresh  
19 frozen cells (pleural effusions (n=79), tumor biopsies (n=42), bone marrow (n=4) and  
20 pericardial effusions and malignant effusions (n=5)). Samples were selected based on the  
21 availability of sufficient tumor material, blast count/pathological cells (80-90%).

22

23

24 Out of 131 samples three samples TP30, TP31, TP55 failed for targeted sequencing  
25 because of the poor quality of DNA and TP100 was excluded as it did not have enough  
26 blast count. 127 evaluable samples were analyzed which included 118 primary samples  
27 that included 21 (~18%) primary samples that suffered relapse, 9 relapse samples  
28 (supplementary Figure 1A). 68% of the samples overlap with the published T-LBL cohort<sup>3</sup>  
29 and 32% of the samples were newly added from patients registered between 2012-2018  
30 in the NHL-BFM center and have not been analyzed for molecular characterization so far.  
31 Genomic DNA was isolated (using QIAamp DNA Mini Kit or QIAamp Blood DNA Mini Kit  
32 as per the manufacturer's instructions. Genomic DNA was sequenced as paired-end run  
33 (2x 150 bp) on an Illumina NextSeq 500 (Illumina, San Diego, USA). After enzymatic  
34 fragmentation of the DNA and pre-capture amplification of the previously selected regions  
35 (RefSeq exons of selected genes + 25 bp of the intronic regions) were enriched by pre-  
36 pooling hybrid-capture technique. Following hybridization, unique barcodes for sample  
37 identification were added by a post-capture amplification. For these steps, the Agilent  
38 SureSelectQXT protocol was used (Agilent Technologies, Santa Clara, USA). Quality  
39 controls during the protocol and for the final and pooled libraries were performed on a  
40 TapeStation (Agilent). Raw data quality was checked using the Illumina Sequencing  
41 Viewer (Illumina) and an in-house pipeline.

42

### 43 **Targeted sequencing**

44 A targeted panel for T-LBL was designed based on the data obtained from WES of 16  
45 patient samples. The selected genes from WES data for the panel displayed non  
46 synonymous somatic mutations and were predicted to be pathogenic or damaging in the  
47 functional prediction software tools like PROVEAN (<http://provean.jcvi.org/index.php>).

48 Also some genes that were relevant for T-ALL pathogenesis based on literature were also  
49 included in the panel.<sup>4,5</sup> Three different versions of the panel were used which had slight  
50 variation either as addition or exclusion of very few genes. Version T-LBLv1 was used for  
51 analysis of samples from batch 1, T-LBLv2 was used for analysis of samples from batch2  
52 and T-LBLv3 for batch 3, 4 and 5.

53

#### 54 **Sanger sequencing**

55 PCR products were amplified with forward and reverse primers for respective genes and  
56 were treated using ExoSap IT (USB Corporation) and sequenced with ABI Prism BigDye  
57 terminator v3.1 (Applied Biosystems). Sequencing reactions were run on an ABI-3730  
58 automated sequencer (Applied Biosystems). All sequences were analyzed using  
59 CodonCode Aligner software to identify mutations.

60 For *BCL11b*, three hotspots spanning exon2<sup>6</sup> and exon4<sup>7</sup> were amplified and sequenced  
61 to identify mutations. Detailed information on the primer sequences and mutations  
62 identified is provided the supplement Table 6 and supplemental Table 7.

63

#### 64 **Analysis of WES and targeted sequencing samples**

65 Sequencing data was aligned to the reference genome GRCh37.67 using BWA mem (Li,  
66 2013). For WES Duplicate reads were removed using Picardtools  
67 (<http://broadinstitute.github.io/picard/>).

68 For WES somatic SNV calling SomaticSniper<sup>8</sup> was used, using a high-confidence filter  
69 (mapping quality >40, somatic score >40). For somatic indel calling Strelka<sup>9</sup> was used  
70 with the default quality filter settings. Variant calling was performed with the two tools  
71 based on their performance in the review articles by Roberts et al.<sup>10</sup> and Xu et al.<sup>11</sup>

72 To increase sensitivity and specificity of the results, two post-processing steps were  
73 applied on the raw variant calling output. 1) Variants with evidence in any germline sample  
74 were removed. All variants with minimum VAF of 0.02, minimum number of alternate reads  
75 of 2, minimum overall coverage of 10 and minimum base quality of 15 (SNVs only) were  
76 considered. This filter allows to remove germline calls that initially have been mislabeled  
77 as somatic due to low coverage in the matching germline samples. 2) Variants present in  
78 only one, either the primary tumor sample or the relapse sample, were re-evaluated with  
79 increased sensitivity (minimum VAF of 0.02, minimum number of alternate reads of 2,  
80 minimum overall coverage of 25 and minimum base quality of 15 (SNVs only)). This re-  
81 evaluation enabled to detect variants that were present with very low VAF at one of the  
82 two time points that were considered.

83 Subsequently, all calls were annotated with SnpEff<sup>12</sup> using annotations based on RefSeq  
84 (hg19). All calls annotated as 3'- or 5'UTR variant, downstream or upstream, intergenic-,  
85 intron- or non-coding exon variant, or splice region variant (additionally annotated as  
86 intron) were excluded. For the remaining calls, exemplary validation experiments were  
87 performed. All samples – germline, tumor and relapse – were re-analyzed by targeted  
88 sequencing, analyzing 76-80 genes that were frequently mutated in the WES data and/or  
89 were known to be associated with T-LBL. Additionally, few selected set of calls were  
90 analyzed with Sanger sequencing.

91 Altogether, 111 calls were validated as somatic mutations by targeted sequencing and/or  
92 Sanger sequencing. Sixty-six calls were identified as being false positive calls (artifacts or  
93 germline calls). Based on these validation results, two quality filters were applied on the  
94 preliminary results.

95 1) Analysis of base quality distribution revealed that artifacts were characterized by a  
96 significantly lower Phred-score compared to somatic mutations. Density estimation  
97 revealed an optimum threshold of 24.94. All calls with average base quality below this  
98 threshold were filtered as artifacts. As base quality can only be determined for SNVs, all  
99 indels were inspected manually.

100 2) Germline calls were usually characterized by being present in common polymorphism  
101 databases, while somatic mutations were often present in common mutation databases.  
102 Analysis was performed for the presence of every call in the polymorphism databases  
103 ESP6500 (<http://evs.gs.washington.edu/EVS/>), 1000 Genomes (The 1000 Genomes  
104 Project Consortium, 2015), ExAC<sup>13</sup>, dbSNP (build 138 excluding sites after 129)<sup>14</sup> and  
105 ClinVar (common and no known medical impact, 03.02.2016).<sup>15</sup> Additionally, dbSNP  
106 (build 138), ClinVar (common and clinical, 03.02.2016) and Cosmic were considered.<sup>16</sup>  
107 Also the type of the mutation, the VAF and the coverage in the tumor- and germline sample  
108 were taken into consideration. All calls present in at least one of the polymorphism  
109 databases were manually evaluated by two independent experts. Targeted sequencing  
110 data was analyzed using the appreci8 pipeline using default parameters.<sup>17</sup> In addition to  
111 automatic classification of the variant calls – as either pathogenic mutations,  
112 polymorphisms or artifacts - by the pipeline, we manually investigated all variant calls.

### 113 ***Genotyping Analysis***

114 Genotypes were generated using Illumina's Infinium HumanOmni2-5Exome BeadArray  
115 following the manufacturer's automatized workflow. Arrays were scanned using the iScan  
116 BeadArray scanner and analyzed by GenomeStudio 2011.1 software both produced by  
117 Illumina, San Diego, US. The quality control checked the process controls in  
118 GenomeStudio's Control Dashboard and standard performance parameters as call rate,

119 B allele frequency plots, and excess of heterozygosity. Genotypes were exported in  
120 Illumina forward allele designation, positions based on GRCh37.2 genome. Copy number  
121 analysis was performed applying Illumina's CNV-Partition v3.1.6 algorithm.

122

### 123 **Methylation Arrays**

124 Methylation arrays were performed on 22 T-LBL samples (n=16 primary+6 relapse)  
125 representing 16 cases along with corresponding germline samples with Infinium  
126 MethylationEPIC BeadChip Kit<sup>18</sup> produced by Illumina, San Diego, US. DNA samples  
127 were processed following the manufacturers guidelines for the automatized workflow.  
128 Bisulfite conversion was performed using Zymo Research, Freiburg, DE, EZ-96  
129 conversion kits. Quality control was performed using Illumina's GenomeStudio 2011.1,  
130 checking process control probes and for probes failing detection p-value thresholds.

131

### 132 ***Methylation Data Filtering, Imputation and Normalization***

133 Probes were filtered on satisfying any one of the following criteria: probes with a detection  
134 p-value above 0.01 in at least 20% of samples; Probes with a beadcount < 3 in at least  
135 5% of samples; non-CpG probes (CpA, CpT, and CpC); Probes with single nucleotide  
136 polymorphisms (SNPs) as identified in<sup>18</sup>; Probes that align to multiple locations as  
137 identified in<sup>19</sup>; Probes on the X or Y chromosome. Most of these criteria are default  
138 settings of ChAMP package for probe filtering<sup>20</sup>. All “not available” (NA) values after  
139 filtering were imputed by KNN (k-nearest neighbors, k = 3) algorithm. BMIQ (Beta Mixture  
140 Quantile dilation) function<sup>21</sup> was applied for normalization. Probe filtering, imputation and  
141 normalization were done using ChAMP package.

142

143 ***DMP Analysis and Hierarchical Clustering***

144 Limma powers differential expression analysis and Benjamini-Hochberg (BH) p-value  
145 adjustment method from ChAMP's champ. DMP() function was used for detection of  
146 differentially methylated position (DMP). Details of Limma package and Limma analysis  
147 has been described by Ritchie ME et al.<sup>22</sup> Beta values of detected DMPs or most variant  
148 probes based on variance were used to plot heatmap using pheatmap package, sorted  
149 by hierarchical clustering. For hierarchical clustering, euclidean distance and complete  
150 linkage were used.

151

152 ***Multidimensional Scaling***

153 Non-metric multidimensional scaling was used to discriminate the differential methylation  
154 of germline and tumor sample groups. Euclidean distances calculated from beta values of  
155 detected DMPs were used to perform Kruskal's non-metric multidimensional scaling with  
156 the isoMDS() function in R.

157

158 **MLPA**

159 ***LOH6q analysis***

160 LOH6q analysis was performed for the newly added T-LBL samples with SALSA MLPA  
161 P200 reference 1 in combination with custom made probes and SALSA MLPA EK1  
162 reagent kit-FAM (MRC Holland) as described in Rohde M, et. al.<sup>23</sup> Briefly, ~50 ng of  
163 genomic DNA from the tumor samples, genomic DNA from healthy individuals as  
164 reference samples and samples from LOH6q positive samples identified from previous  
165 analysis was used as positive controls and MLPA reactions were performed as per the

166 manufacturer's instruction. The data was evaluated using Coffalyser.Net MLPA analysis  
167 software (MRC-Holland).

168

### 169 ***PTEN deletions***

170 Genomic DNA (~50 ng) isolated from fresh frozen tumor (pleural effusions, bone marrow,  
171 lymph nodes) or from peripheral blood from healthy individuals were used as controls  
172 (DNeasy Blood and Tissue kit: Qiagen, Hilden, Germany). The commercial panel, SALSA  
173 MLPA probemix P383T-A2 T-ALL (MRC-Holland; Amsterdam, The Netherlands) was  
174 used to screen *PTEN* deletions. The MLPA assay was performed as per the  
175 manufacturer's instructions. The probe mix includes 4 probes for *PTEN* gene spanning  
176 exon 1(1probe), exon 7(2 probes) and exon 9(1probe). The data was evaluated using  
177 Coffalyser.Net MLPA analysis software (MRC-Holland). The results were normalized and  
178 compared with reference samples which included positive controls (genomic DNA from  
179 the cell line (CEM, T-ALL cell line) or patient samples which were identified to have  
180 deletions in *PTEN*) and DNA from healthy individuals. The samples which were positive  
181 for deletions were analyzed one additional time to reconfirm the results.

182

### 183 **ABD analysis**

184 Single tube multiplex TRG PCR was performed as described by Derrieux C et. al.<sup>24</sup> The  
185 multiplex PCR assay includes primers for all conserved regions involved in  
186 rearrangements in T-cell lymphoid malignancies. PCRs were performed with ~100 ng of  
187 genomic DNA isolated from either pleural effusions, tumor biopsy, bone marrow and  
188 peripheral blood samples, 1U *AmpliTaq* gold (Life Technology 4317742), MgCl<sub>2</sub> and  
189 dNTPs were added at final concentrations of 5mM and 0.2mM, respectively. Denaturation



190 of DNA was performed at 94°C for 8 minutes, followed by 35 cycles comprising of following  
191 steps; denaturation for 45 seconds, primer annealing for 1 minute at 57°C, and extension  
192 for 1 minute 30 seconds at 72°C. Depending on the sensitivity of the instrument, PCR  
193 products were diluted to receive optimal peak heights. PCR products were mixed with Hi-  
194 Di formamide and LIZ size standard, denatured at 95°C for 3 minutes and were size  
195 separated on a high resolution analysis on an ABI PRISM 3130 GeneScan (Perkin-Elmer  
196 Applied Biosystems). The .fsa files are imported and analyzed with the help of software  
197 GeneMapper™ (Thermo Fisher Scientific) or “Microsatellite analysis” tool on Thermo  
198 Fisher Connect, a cloud-based analysis platform (Thermo Fisher Scientific). The  
199 Microsatellite Analysis tool provides all the functions required visualizing the peak pattern  
200 for ABD analysis.

201 The PCR products obtained are in the range of 159-207 bp. The ABD positive samples  
202 display a single peak and ABD negative samples display two peaks. Occasionally  
203 polyclonal peaks are also detected in ABD positive samples, in these cases the tumor  
204 content is checked and confirmed to be of significant percentage.

205

206

207

208 **Supplemental Tables**

209

210 **Supplemental Table 1. List of patient samples**

211

| Sample. ID | Protocol              | sex    | Sample material | EURO-LB 02 Randomization R1 / R2 |
|------------|-----------------------|--------|-----------------|----------------------------------|
| TP1        | EURO-LB 02            | male   | PL              | Dexamethasone / 24 months        |
| TP2        | EURO-LB 02            | male   | PL              | Prednisone                       |
| TP3        | LBL Registry          | female | PL              |                                  |
| TP4        | EURO-LB 02            | male   | TU              | Prednisone                       |
| TP5        | EURO-LB 02            | male   | PL              |                                  |
| TP6        | LBL Registry          | male   | PL              |                                  |
| TP7        | EURO-LB 02            | male   | PL              | Dexamethasone / 24 months        |
| TP8        | LBL Registry          | male   | PL              |                                  |
| TP9        | EURO-LB 02            | female | PL              | Prednisone                       |
| TP10       | LBL Registry          | female | PL              |                                  |
| TP11       | EURO-LB 02            | male   | PL              | Prednisone / 24 months           |
| TP12       | LBL Registry          | male   | EX              |                                  |
| TP13       | LBL Registry          | male   | TU              |                                  |
| TP14       | LBL Registry          | male   | PL              |                                  |
| TP15       | EURO-LB 02            | male   | PL              |                                  |
| TP16       | NHL-BFM Registry 2012 | male   | TU              |                                  |
| TP17       | NHL-BFM Registry 2012 | male   | PL              |                                  |
| TP18       | NHL-BFM Registry 2012 | male   | PL              |                                  |
| TP19       | NHL-BFM Registry 2012 | male   | TU              |                                  |
| TP20       | NHL-BFM Registry 2012 | male   | TU              |                                  |
| TP21       | NHL-BFM Registry 2012 | male   | TU              |                                  |
| TP22       | NHL-BFM Registry 2012 | male   | TU              |                                  |
| TP23       | NHL-BFM Registry 2012 | female | PL              |                                  |
| TP24       | NHL-BFM Registry 2012 | male   | PL              |                                  |
| TP25       | NHL-BFM Registry 2012 | male   | PL              |                                  |
| TP26       | NHL-BFM Registry 2012 | male   | PL              |                                  |
| TP27       | NHL-BFM Registry 2012 | male   | TU              |                                  |
| TP28       | NHL-BFM Registry 2012 | male   | TU              |                                  |
| TP29       | NHL-BFM Registry 2012 | female | PL              |                                  |
| TP30       | EURO-LB 02            | male   | TU              |                                  |
| TP31       | EURO-LB 02            | male   | TU              |                                  |
| TP32       | NHL-BFM 95            | female | PL              |                                  |
| TP33       | EURO-LB 02            | female | PL              | Prednisone                       |
| TP34       | NHL-BFM 95            | male   | PL              |                                  |

212

| Supplemental Table 1 cont. |              |        |                 |                                  |
|----------------------------|--------------|--------|-----------------|----------------------------------|
| Sample. ID                 | Study        | sex    | Sample material | EURO-LB 02 Randomization R1 / R2 |
| TP35                       | NHL-BFM 95   | male   | PL              |                                  |
| TP36                       | NHL-BFM 95   | female | PL              |                                  |
| TP37                       | EURO-LB 02   | male   | TU              | Dexamethasone                    |
| TP38                       | EURO-LB 02   | female | PL              |                                  |
| TP39                       | EURO-LB 02   | male   | PL              | Dexamethasone / 24 months        |
| TP40                       | EURO-LB 02   | female | PL              | Prednisone / 18 months           |
| TP41                       | EURO-LB 02   | male   | TU              | Dexamethasone / 24 months        |
| TP42                       | EURO-LB 02   | male   | PL              | Prednisone                       |
| TP43                       | LBL Registry | female | PL              |                                  |
| TP44                       | NHL-BFM 95   | female | PL              |                                  |
| TP45                       | NHL-BFM 95   | male   | PL              |                                  |
| TP46                       | NHL-BFM 95   | female | PL              |                                  |
| TP47                       | EURO-LB 02   | male   | TU              | Prednisone / 24 months           |
| TP48                       | NHL-BFM 95   | female | TU              |                                  |
| TP49                       | NHL-BFM 95   | male   | PL              |                                  |
| TP50                       | NHL-BFM 95   | male   | PL              |                                  |
| TP51                       | NHL-BFM 95   | female | PL              |                                  |
| TP52                       | NHL-BFM 95   | male   | TU              |                                  |
| TP53                       | EURO-LB 02   | male   | PL              |                                  |
| TP54                       | LBL Registry | male   | PL              |                                  |
| TP55                       | LBL Registry | female | PL              |                                  |
| TP56                       | LBL Registry | male   | PL              |                                  |
| TP57                       | LBL Registry | female | PL              |                                  |
| TP58                       | LBL Registry | female | TU              |                                  |
| TP59                       | EURO-LB 02   | female | TU              | Dexamethasone / 24 months        |
| TP60                       | EURO-LB 02   | female | TU              | Dexamethasone / 24 months        |
| TP61                       | EURO-LB 02   | male   | TU              | Prednisone / 18 months           |
| TP62                       | NHL-BFM 95   | female | PL              |                                  |
| TP63                       | LBL Registry | male   | TU              |                                  |
| TP64                       | NHL-BFM 95   | male   | TU              |                                  |
| TP65                       | EURO-LB 02   | male   | TU              | Dexamethasone / 18 months        |
| TP66                       | NHL-BFM 95   | female | PL              |                                  |
| TP67                       | LBL Registry | male   | PL              |                                  |
| TP68                       | LBL Registry | male   | PL              |                                  |
| TP69                       | LBL Registry | male   | PL              |                                  |
| TP70                       | LBL Registry | female | TU              |                                  |
| TP71                       | LBL Registry | male   | PL              |                                  |

| Supplemental Table 1 cont. |                       |        |                 |                                  |
|----------------------------|-----------------------|--------|-----------------|----------------------------------|
| Sample ID                  | Study                 | sex    | Sample material | EURO-LB 02 Randomization R1 / R2 |
| TP72                       | LBL Registry          | female | PL              |                                  |
| TP73                       | LBL Registry          | male   | PL              |                                  |
| TP74                       | EURO-LB 02            | male   | PL              | Prednisone / 18 months           |
| TP75                       | LBL Registry          | male   | PL              |                                  |
| TP76                       | LBL Registry          | female | PL              |                                  |
| TP77                       | EURO-LB 02            | male   | TU              | Dexamethasone / 24 months        |
| TP78                       | EURO-LB 02            | male   | TU              | Dexamethasone                    |
| TP79                       | EURO-LB 02            | male   | TU              | Prednisone                       |
| TP80                       | EURO-LB 02            | male   | TU              | Dexamethasone / 18 months        |
| TP81                       | EURO-LB 02            | male   | PL              | Dexamethasone / 18 months        |
| TP82                       | EURO-LB 02            | male   | PL              | Prednisone / 24 months           |
| TP83                       | EURO-LB 02            | male   | PL              |                                  |
| TP84                       | EURO-LB 02            | female | PK              | Prednisone / 24 months           |
| TP85                       | LBL Registry          | male   | TU              |                                  |
| TP86                       | LBL Registry          | male   | PL              |                                  |
| TP87                       | LBL Registry          | female | PL              |                                  |
| TP88                       | LBL Registry          | male   | PL              |                                  |
| TP89                       | LBL Registry          | male   | PK              |                                  |
| TP90                       | LBL Registry          | male   | PL              |                                  |
| TP91                       | LBL Registry          | male   | PL              |                                  |
| TP92                       | LBL Registry          | female | PL              |                                  |
| TP93                       | LBL Registry          | female | PL              |                                  |
| TP94                       | LBL Registry          | female | TU              |                                  |
| TP95                       | LBL Registry          | male   | PL              |                                  |
| TP96                       | EURO-LB 02            | female | TU              |                                  |
| TP97                       | LBL Registry          | male   | PL              |                                  |
| TP98                       | NHL-BFM Registry 2012 | male   | PL              |                                  |
| TP99                       | NHL-BFM Registry 2012 | male   | PK              |                                  |
| TP100                      | NHL-BFM Registry 2012 | male   | GL              |                                  |
| TP101                      | NHL-BFM Registry 2012 | male   | PL              |                                  |
| TP102                      | NHL-BFM Registry 2012 | male   | PL              |                                  |
| TP103                      | NHL-BFM Registry 2012 | male   | PL              |                                  |
| TP104                      | NHL-BFM Registry 2012 | male   | PL              |                                  |
| TP105                      | NHL-BFM Registry 2012 | male   | PL              |                                  |
| TP106                      | NHL-BFM Registry 2012 | male   | TU              |                                  |
| TP107                      | NHL-BFM Registry 2012 | male   | TU              |                                  |

| Supplemental Table 1 cont. |                       |        |                 |                                  |
|----------------------------|-----------------------|--------|-----------------|----------------------------------|
| Sample. ID                 | Study                 | sex    | Sample material | EURO-LB 02 Randomization R1 / R2 |
| TP108                      | NHL-BFM Registry 2012 | male   | TU              |                                  |
| TP109                      | NHL-BFM Registry 2012 | female | PL              |                                  |
| TP110                      | NHL-BFM Registry 2012 | male   | TU              |                                  |
| TP111                      | NHL-BFM Registry 2012 | male   | TU              |                                  |
| TP112                      | NHL-BFM Registry 2012 | male   | TU              |                                  |
| TP113                      | NHL-BFM Registry 2012 | male   | PL              |                                  |
| TP114                      | NHL-BFM Registry 2012 | male   | TU              |                                  |
| TP115                      | NHL-BFM Registry 2012 | male   | PL              |                                  |
| TP116                      | NHL-BFM Registry 2012 | male   | TU              |                                  |
| TP117                      | NHL-BFM Registry 2012 | male   | PL              |                                  |
| TP118                      | NHL-BFM 95            | male   | PL              |                                  |
| TP119                      | NHL-BFM Registry 2012 | male   | PL              |                                  |
| TP120                      | EURO-LB 02            | male   | TU              |                                  |
| TP121                      | NHL-BFM Registry 2012 | male   | PL              |                                  |
| TP122                      | NHL-BFM Registry 2012 | male   | PL              |                                  |
| TR11                       | EURO-LB 02            | male   | PL              | Prednisone / 18 months           |
| TR12                       | LBL Registry          | male   | EX              |                                  |
| TR13                       | LBL Registry          | male   | TU              |                                  |
| TR14                       | LBL Registry          | male   | PL              |                                  |
| TR15                       | LBL Registry          | male   | TU              |                                  |
| TR16                       | NHL-BFM Registry 2012 | male   | BM              |                                  |
| TR17                       | NHL-BFM Registry 2012 | male   | BM              |                                  |
| TR18                       | NHL-BFM Registry 2012 | male   | BM              |                                  |
| TR19                       | NHL-BFM Registry 2012 | male   | BM              |                                  |

215

216

217 **Supplemental Table 1.** List of patient identification (ID), study protocol and sample

218 material of the analyzed cases. PL: pleural effusion (n=79), TU: tumor biopsy (n=42), PK:

219 pericardial effusion (n=3), Ex: malignant effusion (n=2), BM: bone marrow (n=4), GL: germ

220 line. The number of cases from different studies in the analyzed cohort are as follows:

221 NHL-BFM 95, n=16; EURO-LB 02, n=35; LBL Registry, n=39; NHL-BFM Registry 2012,

222 n=41.

**Supplemental Table 2. List of genes from the targeted panel**

|    | T-LBLv1  | T-LBLv2  | T-LBLv3    |
|----|----------|----------|------------|
|    | batch 1  | batch2   | batch3,4,5 |
| 1  | ABCC6    | ABCC6    | ABCC6      |
| 2  | AGO2     | AGO2     | AGO2       |
| 3  | ANXA2    | ANXA2    | ANXA2      |
| 4  | ASS1     | ASS1     | ASS1       |
| 5  | BRAF     | BRAF     | BRAF       |
| 6  | CAM2G    | CAM2G    | CAM2G      |
| 7  | CCNC     | CCNC     | CCNC       |
| 8  | CDC27    | CDC27    | CDC27      |
| 9  | CDKN1B   | CDKN1B   | CDKN1B     |
| 10 | CCND3    | CCND3    | CCND3      |
| 11 | CHFR     | CHFR     | CHFR       |
| 12 | CISH     | CISH     | CISH       |
| 13 | CPEB3    | CPEB3    | CPEB3      |
| 14 | CREBBP   | CREBBP   | CREBBP     |
| 15 | CSMD1    | CSMD1    | CSMD1      |
| 16 | CTCF     | CTCF     | CTCF       |
| 17 | DDX3X    | DDX3X    | DDX3X      |
| 18 | DNM2     | DNM2     | DNM2       |
| 19 | DNMT3A   | DNMT3A   | DNMT3A     |
| 20 | EHBP1    | EHBP1    | EHBP1      |
| 21 | FBXW7    | FBXW7    | FBXW7      |
| 22 | FZD9     | FZD9     | FZD9       |
| 23 | GNAI2    | GNAI2    | GNAI2      |
| 24 | HCK      | HCK      | HCK        |
| 25 | HLA-DRB5 | HLA-DRB5 | HLA-DRB5   |
| 26 | HNRNPK   | HNRNPK   | HNRNPK     |
| 27 | JAK2     | JAK2     | JAK2       |
| 28 | JAK3     | JAK3     | JAK3       |
| 29 | KDM3A    | KDM3A    | KDM3A      |
| 30 | KDM6B    | KDM6B    | KDM6B      |
| 31 | KMT2C    | KMT2C    | KMT2C      |
| 32 | KMT2D    | KMT2D    | KMT2D      |
| 33 | KRAS     | KRAS     | KRAS       |
| 34 | MAPK3    | MAPK3    | MAPK3      |
| 35 | MCM10    | MCM10    | MCM10      |
| 36 | MCM9     | MCM9     | MCM9       |
| 37 | MDC1     | MDC1     | MDC1       |
| 38 | MED12    | MED12    | MED12      |

| Supp.Table 2 contd. |         |         |            |
|---------------------|---------|---------|------------|
|                     | T-LBLv1 | T-LBLv2 | T-LBLv3    |
|                     | batch 1 | batch2  | batch3,4,5 |
| 39                  | MFHAS1  | MFHAS1  | MFHAS1     |
| 40                  | MIB2    | MIB2    | MIB2       |
| 41                  | MLH1    | MLH1    | MLH1       |
| 42                  | MTRR    | MTRR    | MTRR       |
| 43                  | MYCBP2  | MYCBP2  | MYCBP2     |
| 44                  | NEK1    | NEFM    | NEFM       |
| 45                  | NOS3    | NEK1    | NEK1       |
| 46                  | NOTCH1  | NOS3    | NOS3       |
| 47                  | NOTCH3  | NOTCH1  | NOTCH1     |
| 48                  | NRAS    | NOTCH3  | NOTCH3     |
| 49                  | NT5C1A  | NRAS    | NRAS       |
| 50                  | NT5C2   | NT5C1A  | NT5C1A     |
| 51                  | PCDH7   | NT5C2   | NT5C2      |
| 52                  | PHF6    | PCDH7   | PCDH7      |
| 53                  | PIAS3   | PHF6    | PHF6       |
| 54                  | PIK3CA  | PIAS3   | PIAS3      |
| 55                  | PTEN    | PIK3CA  | PIK3CA     |
| 56                  | PTPRT   | PTEN    | PTEN       |
| 57                  | RIN1    | PTPRT   | PTPRT      |
| 58                  | ROR2    | RIN1    | RIN1       |
| 59                  | RPL22   | ROR2    | ROR2       |
| 60                  | RUNX1   | RPL22   | RPL22      |
| 61                  | SETD1B  | RUNX1   | RUNX1      |
| 62                  | SON     | SETD1B  | SETD1B     |
| 63                  | STAT5B  | SON     | SON        |
| 64                  | STK39   | STAT5B  | STAT5B     |
| 65                  | TAL1    | STK39   | STK39      |
| 66                  | TCF3    | TAL1    | TAL1       |
| 67                  | TP53    | TCF3    | TCF3       |
| 68                  | TRAF7   | TFAP4   | TFAP4      |
| 69                  | TTN*    | TP53    | TP53       |
| 70                  | UCK2    | TRAF7   | TRAF7      |
| 71                  | USH2A   | TTN     | UCK2       |
| 72                  | WT1     | UCK2    | USH2A      |
| 73                  | XIST*   | USH2A   | WT1        |
| 74                  | TRAF6   | WT1     | ZBTB24     |
| 75                  | MUC4    | ZBTB24  | XIST*      |
| 76                  | LAMA2   | XIST*   | USP24*     |

| Supp. Table 2 contd. |                      |                                     |                                         |
|----------------------|----------------------|-------------------------------------|-----------------------------------------|
|                      | T-LBLv1              | T-LBLv2                             | T-LBLv3                                 |
|                      | batch 1              | batch2                              | batch3,4,5                              |
| 77                   | ZNF208               |                                     | USP7                                    |
| 78                   | ZNF91                |                                     | IL7R                                    |
| 79                   |                      |                                     | KDM6A                                   |
| 80                   |                      |                                     | ZNF91                                   |
| Samples              | TG1-TG16<br>TP1-TP16 | TG17-TG29<br>TP17-TP29<br>TR11-TR16 | TP30-TP122<br>TR116, TR123 and<br>TR124 |

227

228 **Supplemental Table 2.** List of genes from the different versions of the targeted panel (v1,

229 v2 and v3) used for the targeted sequencing of the extended cohort. (\* indicates that for

230 some of the large genes only selected regions were included to design the probes).



232 **Supplemental Table 3.** Mutation rates of samples analyzed by whole exome  
 233 sequencing

| Sample | Mutations | Target size | Mutation rate/Mbp | VAF<0.15 | %     | VAF>=0.15 | %      |
|--------|-----------|-------------|-------------------|----------|-------|-----------|--------|
| TP1    | 21        | 65343296    | 0.32              | 4        | 19.05 | 17        | 80.95  |
| TP2    | 27        | 65343296    | 0.41              | 0        | 0.00  | 27        | 100.00 |
| TP3    | 20        | 65343296    | 0.31              | 0        | 0.00  | 20        | 100.00 |
| TP4    | 12        | 65343296    | 0.18              | 1        | 8.33  | 11        | 91.67  |
| TP5    | 17        | 65343296    | 0.26              | 1        | 5.88  | 16        | 94.12  |
| TP6    | 28        | 65343296    | 0.43              | 1        | 3.57  | 27        | 96.43  |
| TP7    | 3         | 65343296    | 0.05              | 0        | 0.00  | 3         | 100.00 |
| TP8    | 37        | 65343296    | 0.57              | 0        | 0.00  | 37        | 100.00 |
| TP9    | 23        | 65343296    | 0.35              | 2        | 8.70  | 21        | 91.30  |
| TP10   | 42        | 65343296    | 0.64              | 0        | 0.00  | 42        | 100.00 |
| TP11   | 30        | 65343296    | 0.46              | 0        | 0.00  | 30        | 100.00 |
| TR11   | 56        | 65343296    | 0.86              | 1        | 1.79  | 55        | 98.21  |
| TP12   | 15        | 65343296    | 0.23              | 1        | 6.67  | 14        | 93.33  |
| TR12   | 14        | 65343296    | 0.21              | 2        | 14.29 | 12        | 85.71  |
| TP13   | 16        | 65343296    | 0.24              | 0        | 0.00  | 16        | 100.00 |
| TR13   | 59        | 65343296    | 0.90              | 0        | 0.00  | 59        | 100.00 |
| TP14   | 17        | 65343296    | 0.26              | 1        | 5.88  | 16        | 94.12  |
| TR14   | 518       | 65343296    | 7.93              | 3        | 0.58  | 515       | 99.42  |
| TP15   | 24        | 65343296    | 0.37              | 1        | 4.17  | 23        | 95.83  |
| TR15   | 189       | 65343296    | 2.89              | 18       | 9.52  | 171       | 90.48  |

234  
 235 **Supplemental Table 3.** Mutation rates of samples from the cases of “limited cohort”  
 236 screened by whole exome sequencing.

237

238

239 **Supplemental Table 4. Top-10 significant genes as reported by MutSigCV**

240

| gene    | expr    | reptime | hic | N_Non silent | N_silent | N_non coding | n_non silent | n_silent | n_non coding | nnei | x | X       | p        | q        |
|---------|---------|---------|-----|--------------|----------|--------------|--------------|----------|--------------|------|---|---------|----------|----------|
| NOTCH1  | 1489379 | 212     | 43  | 364840       | 103160   | 0            | 16           | 1        | 0            | 50   | 1 | 1275080 | 1,53E-07 | 2,88E-03 |
| FBXW7   | 117295  | 501     | 51  | 122080       | 32720    | 0            | 6            | 1        | 0            | 50   | 2 | 1348780 | 4,66E-04 | 1        |
| CDKN1B  | 791330  | 136     | 44  | 28480        | 7820     | 0            | 2            | 0        | 0            | 50   | 0 | 1141080 | 2,87E-03 | 1        |
| ZSCAN22 | 1621097 | 406     | -25 | 69200        | 19840    | 0            | 2            | 0        | 0            | 50   | 0 | 1116840 | 3,06E-03 | 1        |
| NRAS    | 600650  | 472     | 11  | 28140        | 7260     | 0            | 3            | 0        | 0            | 50   | 2 | 1181460 | 3,10E-03 | 1        |
| STAT5B  | 2101162 | 190     | 31  | 115400       | 30760    | 0            | 5            | 0        | 0            | 50   | 0 | 1214200 | 8,28E-03 | 1        |
| PIK3R6  | 423397  | 636     | 11  | 108020       | 32380    | 0            | 2            | 0        | 0            | 50   | 0 | 1162080 | 8,33E-03 | 1        |
| DCAF7   | 934619  | 247     | -1  | 49440        | 13800    | 0            | 2            | 0        | 0            | 50   | 0 | 994720  | 9,47E-03 | 1        |
| CNFN    | 792230  | 218     | 42  | 16500        | 4560     | 0            | 1            | 0        | 0            | 50   | 1 | 1377000 | 1,51E-02 | 1        |
| HMG2    | 1003175 | 167     | 31  | 14140        | 3440     | 0            | 1            | 0        | 0            | 50   | 2 | 1095960 | 1,64E-02 | 1        |

241

242 **Supplemental Table 4. Top-10 significant genes as reported by MutSigCV.**

243 Details of the column names: N\_nonsilent, number of covered sequenced bases containing non-silent mutations; N\_silent, number of  
 244 covered sequenced bases containing silent mutations; N\_noncoding, number of covered sequenced bases containing noncoding  
 245 mutations; n\_nonsilent, number of non-silent mutations; n\_silent, number of silent mutations; n\_noncoding, number of noncoding  
 246 mutations; nnei, number of neighboring genes; x, number of mutated bases in neighboring genes; X total number of bases related to  
 247 neighboring genes; p, p-value; q, q-value, i.e. adjusted p-value. Note. The table is provided as excel files separately

**Supplement Table 5. Mutational status of KMT2D, PTEN, NOTCH1 and FBXW7**

| Sample | KMT2D | PTEN | NOTCH1 | FBXW7 |
|--------|-------|------|--------|-------|
| TP1    | 0     | 0    | 1      | 1     |
| TP2    | 0     | 0    | 0      | 0     |
| TP3    | 0     | 0    | 0      | 1     |
| TP4    | 0     | 0    | 1      | 1     |
| TP5    | 0     | 0    | 0      | 0     |
| TP6    | 0     | 0    | 1      | 0     |
| TP7    | 0     | 0    | 1      | 0     |
| TP8    | 0     | 0    | 1      | 1     |
| TP9    | 0     | 0    | 1      | 0     |
| TP10   | 0     | 0    | 1      | 1     |
| TP11   | 0     | 0    | 1      | 0     |
| TP12   | 0     | 0    | 1      | 0     |
| TP13   | 0     | 0    | 1      | 0     |
| TP14   | 0     | 0    | 0      | 0     |
| TP15   | 0     | 0    | 0      | 0     |
| TP16   | 0     | 1    | 1      | 0     |
| TP17   | 0     | 0    | 1      | 0     |
| TP18   | 0     | 0    | 1      | 0     |
| TP19   | 0     | 0    | 0      | 0     |
| TP20   | 0     | 0    | 1      | 1     |
| TP21   | 0     | 0    | 1      | 0     |
| TP22   | 0     | 0    | 1      | 1     |
| TP23   | 0     | 0    | 1      | 0     |
| TP24   | 0     | 0    | 0      | 1     |
| TP25   | 0     | 0    | 0      | 1     |
| TP26   | 0     | 0    | 1      | 1     |
| TP27   | 0     | 0    | 1      | 0     |
| TP28   | 1     | 0    | 1      | 0     |
| TP29   | 0     | 0    | 0      | 0     |
| TP30   | 2     | 2    | 2      | 2     |
| TP31   | 2     | 2    | 2      | 2     |
| TP32   | 0     | 0    | 0      | 1     |
| TP33   | 0     | 0    | 1      | 1     |
| TP34   | 0     | 1    | 0      | 0     |
| TP35   | 0     | 0    | 0      | 0     |
| TP36   | 0     | 0    | 0      | 0     |
| TP37   | 0     | 0    | 1      | 0     |
| TP38   | 1     | 0    | 1      | 1     |
| TP39   | 0     | 0    | 1      | 0     |
| TP40   | 0     | 0    | 0      | 0     |

| Supp. Table 5 cont |       |      |        |       |
|--------------------|-------|------|--------|-------|
| Sample             | KMT2D | PTEN | NOTCH1 | FBXW7 |
| TP41               | 0     | 1    | 1      | 0     |
| TP42               | 0     | 0    | 0      | 0     |
| TP43               | 0     | 1    | 1      | 0     |
| TP44               | 0     | 0    | 0      | 0     |
| TP45               | 0     | 0    | 0      | 1     |
| TP46               | 0     | 0    | 0      | 1     |
| TP47               | 0     | 1    | 1      | 0     |
| TP48               | 0     | 0    | 1      | 0     |
| TP49               | 0     | 0    | 1      | 1     |
| TP50               | 0     | 1    | 1      | 0     |
| TP51               | 0     | 0    | 1      | 1     |
| TP52               | 0     | 0    | 0      | 1     |
| TP53               | 0     | 1    | 0      | 0     |
| TP54               | 0     | 0    | 0      | 1     |
| TP55               | 2     | 2    | 2      | 2     |
| TP56               | 0     | 0    | 0      | 0     |
| TP57               | 0     | 0    | 0      | 0     |
| TP58               | 0     | 0    | 1      | 0     |
| TP59               | 0     | 0    | 0      | 0     |
| TP60               | 0     | 1    | 0      | 0     |
| TP61               | 0     | 0    | 0      | 0     |
| TP62               | 0     | 0    | 1      | 0     |
| TP63               | 0     | 1    | 1      | 0     |
| TP64               | 0     | 0    | 1      | 1     |
| TP65               | 0     | 0    | 1      | 1     |
| TP66               | 0     | 0    | 1      | 0     |
| TP67               | 0     | 0    | 0      | 0     |
| TP68               | 0     | 0    | 0      | 0     |
| TP69               | 0     | 0    | 1      | 1     |
| TP70               | 1     | 0    | 1      | 0     |
| TP71               | 0     | 0    | 1      | 1     |
| TP72               | 0     | 0    | 1      | 0     |
| TP73               | 0     | 0    | 1      | 0     |
| TP74               | 0     | 0    | 1      | 0     |
| TP75               | 0     | 0    | 0      | 1     |
| TP76               | 1     | 0    | 0      | 0     |
| TP77               | 0     | 0    | 0      | 0     |
| TP78               | 0     | 0    | 1      | 0     |
| TP79               | 0     | 0    | 0      | 0     |
| TP80               | 0     | 0    | 1      | 1     |

| Supp. Table 5 cont |       |      |        |       |
|--------------------|-------|------|--------|-------|
| Sample             | KMT2D | PTEN | NOTCH1 | FBXW7 |
| TP81               | 1     | 0    | 1      | 0     |
| TP82               | 0     | 1    | 1      | 0     |
| TP83               | 1     | 0    | 0      | 0     |
| TP84               | 0     | 0    | 0      | 0     |
| TP85               | 0     | 0    | 1      | 0     |
| TP86               | 0     | 1    | 1      | 0     |
| TP87               | 0     | 1    | 0      | 0     |
| TP88               | 0     | 0    | 1      | 0     |
| TP89               | 0     | 1    | 1      | 0     |
| TP90               | 0     | 0    | 0      | 0     |
| TP91               | 0     | 0    | 1      | 0     |
| TP92               | 0     | 0    | 1      | 0     |
| TP93               | 1     | 0    | 0      | 0     |
| TP94               | 0     | 1    | 0      | 0     |
| TP95               | 0     | 0    | 1      | 0     |
| TP96               | 0     | 0    | 1      | 0     |
| TP97               | 0     | 1    | 0      | 0     |
| TP98               | 0     | 1    | 0      | 0     |
| TP99               | 0     | 0    | 1      | 0     |
| TP100              | 2     | 2    | 2      | 2     |
| TP101              | 1     | 0    | 1      | 0     |
| TP102              | 0     | 0    | 0      | 0     |
| TP103              | 0     | 0    | 0      | 1     |
| TP104              | 0     | 0    | 1      | 0     |
| TP105              | 0     | 0    | 1      | 1     |
| TP106              | 0     | 0    | 0      | 0     |
| TP107              | 0     | 0    | 1      | 0     |
| TP108              | 0     | 0    | 0      | 0     |
| TP109              | 0     | 0    | 0      | 0     |
| TP110              | 0     | 0    | 0      | 0     |
| TP111              | 0     | 0    | 0      | 1     |
| TP112              | 0     | 0    | 1      | 1     |
| TP113              | 1     | 1    | 0      | 0     |
| TP114              | 0     | 0    | 0      | 0     |
| TP115              | 0     | 0    | 1      | 0     |
| TP116              | 1     | 0    | 0      | 0     |
| TP117              | 0     | 0    | 1      | 0     |
| TP118              | 0     | 0    | 1      | 0     |
| TP119              | 0     | 0    | 0      | 0     |
| TP120              | 0     | 0    | 1      | 0     |
| TP121              | 1     | 0    | 1      | 1     |
| TP122              | 0     | 0    | 1      | 0     |

| Supp. Table 5 cont |       |      |        |       |
|--------------------|-------|------|--------|-------|
| Sample             | KMT2D | PTEN | NOTCH1 | FBXW7 |
| TR11               | 0     | 0    | 1      | 0     |
| TR12               | 0     | 0    | 0      | 0     |
| TR13               | 0     | 0    | 0      | 0     |
| TR14               | 1     | 0    | 0      | 0     |
| TR15               | 0     | 0    | 1      | 0     |
| TR16               | 0     | 1    | 1      | 0     |
| TR116              | 0     | 0    | 0      | 0     |
| TR123              | 0     | 1    | 0      | 0     |
| TR124              | 0     | 0    | 0      | 0     |

252

253 **Supplemental Table 5.** Supplemental Table 5. Mutational status of *KMT2D*, *PTEN*,

254 *NOTCH1* (only exons 26, 27 and 34) and *FBXW7* (only exons 9, 10 and 12) in the

255 extended cohort. 0-not mutated, 1- mutated, 2-failed sequencing,

256 Purple represents *KMT2D*<sup>mut</sup> (n=4) in *NOTCH1*<sup>wt</sup> and/or *FBXW7*<sup>wt</sup> (N/F<sup>wt</sup>); pink represents

257 *PTEN*<sup>mut</sup> in N/F<sup>wt</sup> (n=7); green represents *KMT2D*<sup>mut</sup> + *PTEN*<sup>mut</sup> in N/F<sup>wt</sup> (n=1); yellow

258 represents samples failed in targeted sequencing; orange represents relapse cases are

259 not included in the assessment of prognostic relevance

260

261 **Supplemental Table 6.** Primers used in the mutational analysis of *BCL11B* and ABD  
 262 analysis  
 263

| No. | Name           | Primer sequence         | Reference                                         |
|-----|----------------|-------------------------|---------------------------------------------------|
| 1   | BCL11B_ex2_F   | TGACCGCCTAAGCCCATCTCTAT | Provided by the Department of Immunology, Erasmus |
| 2   | BCL11B_ex2_R   | GCCCCGGCTGGTGGCCCAGAGG  | Provided by the Department of Immunology, Erasmus |
| 3   | BCL11B_ex4B_F  | CAGTGCCTTCGACCGAGT      |                                                   |
| 4   | BCL11B_ex4B_R  | CGGCTCTCGTTCTCCAGTAG    |                                                   |
| 5   | BCL11B_ex4C_F  | GCATCAAGGTGGAGAAGGAC    | K. De Keersmaecker Nat Med.2010                   |
| 6   | BCL11B_ex4C_R  | CTCGGGTTTCCATAGGACTTC   | K. De Keersmaecker Nat. Med.2010                  |
|     |                |                         |                                                   |
| 7   | TRGV1f         | GGTTGTGTTGGAATCAGGAGTCA | Euroclonality Biomed-2 protocols                  |
| 8   | TRGV9          | CGGCACTGTCAGAAAGGAATC   | Euroclonality Biomed-2 protocols                  |
| 9   | TRGV10         | AGCATGGGTAAGACAAGCAA    | Euroclonality Biomed-2 protocols                  |
| 10  | TRGV11         | TTGCTCAGGTGGGAAGACTA    | Euroclonality Biomed-2 protocols                  |
| 11  | TRGJ1/J2_FAM   | GTGTTGTTCCACTGCCAAAGAG  | Euroclonality Biomed-2 protocols                  |
| 12  | TRGJP1/JP2_FAM | AGTTACTATGAGCYTAGTCCCTT | Euroclonality Biomed-2 protocols                  |

264  
 265 **Supplemental Table 6.** Primers 1-6 were used for *BCL11B* mutational analysis and  
 266 primers 7-12 were used for ABD analysis

267  
 268  
 269  
 270  
 271  
 272

**Supplemental Table 7. Detailed description of identified mutations in BCL11B**

| Sample ID | exon | DNA<br>(NM_138576.4)                                                            | Codon change     | Mutation type |
|-----------|------|---------------------------------------------------------------------------------|------------------|---------------|
| TP35      | 2    | c.122_c.123insCCGTTTCG<br>TCTTATAGATGGCAAGAC<br>GAGGGTCTGGAGATAG<br>AGGAGCC het | P41Pfs5*         | frameshift    |
| TP11      | 4    | c.2561A>G het                                                                   | Y854C            | missense      |
| TP18      | 4    | c.1156_1165delinsTAAA<br>CTTT het                                               | N386*            | nonsense      |
| TP20      | 4    | c.1284_1285insAAAATTT<br>ACGGG                                                  | S428_C429insKIYG | indel         |
| TP32      | 4    | c.1089_1088insCCC                                                               | F363_S364insP    | indel         |
| TP34      | 4    | c.1391G>A het                                                                   | C464Y            | missense      |
| TP35      | 4    | c.1483G>A het                                                                   | A495T            | missense      |
| TP41      | 4    | c.1378T>C het                                                                   | C460R            | missense      |
| TP45      | 4    | c.2655_2676delinsCCGTT<br>GG het                                                | V886Pfs106*      | frameshift    |
| TP51      | 4    | c.1283_1284insACCTAGCC<br>het                                                   | S428Sfs48*       | frameshift    |
| TP120     | 4    | c.1349C>T het                                                                   | T450M            | missense      |
| TR116     | 4    | c.1483G>A het                                                                   | A495T            | missense      |



276 **Supplemental Figures**

277 **Supplemental Figure 1. Overview of samples used in the current project**

278

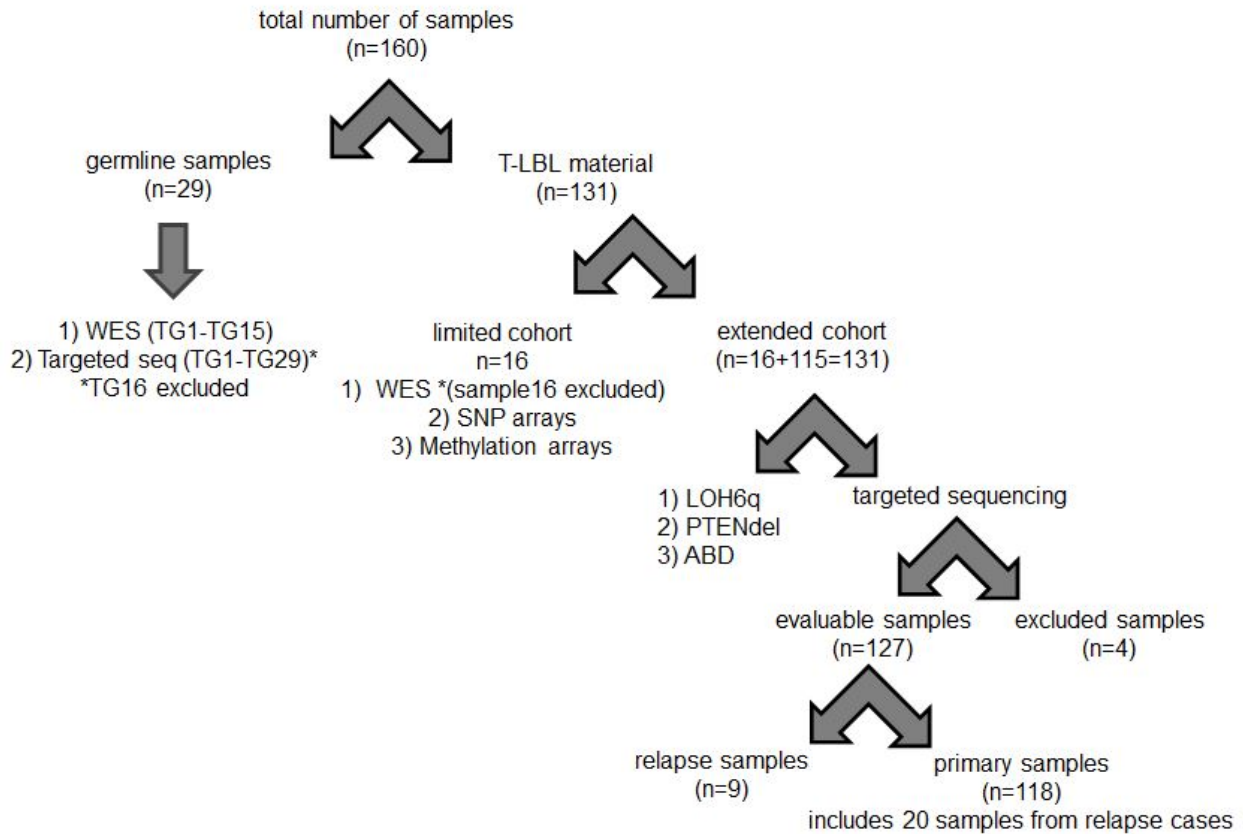

279

280 **Supplemental Figure 1. Schematic overview of samples and mutational spectrum**

281 **of T-LBL.** Overview of samples used in the current project. In total 131 samples including

282 118 primary samples and 9 relapse samples (including 7 matched relapse samples

283 (TR11-TR17) and 2 single relapse samples (TR18 and TR19)).

284

285

286 **Supplemental Figure 2. Mutational spectrum of T-LBL (VAF>1%)**

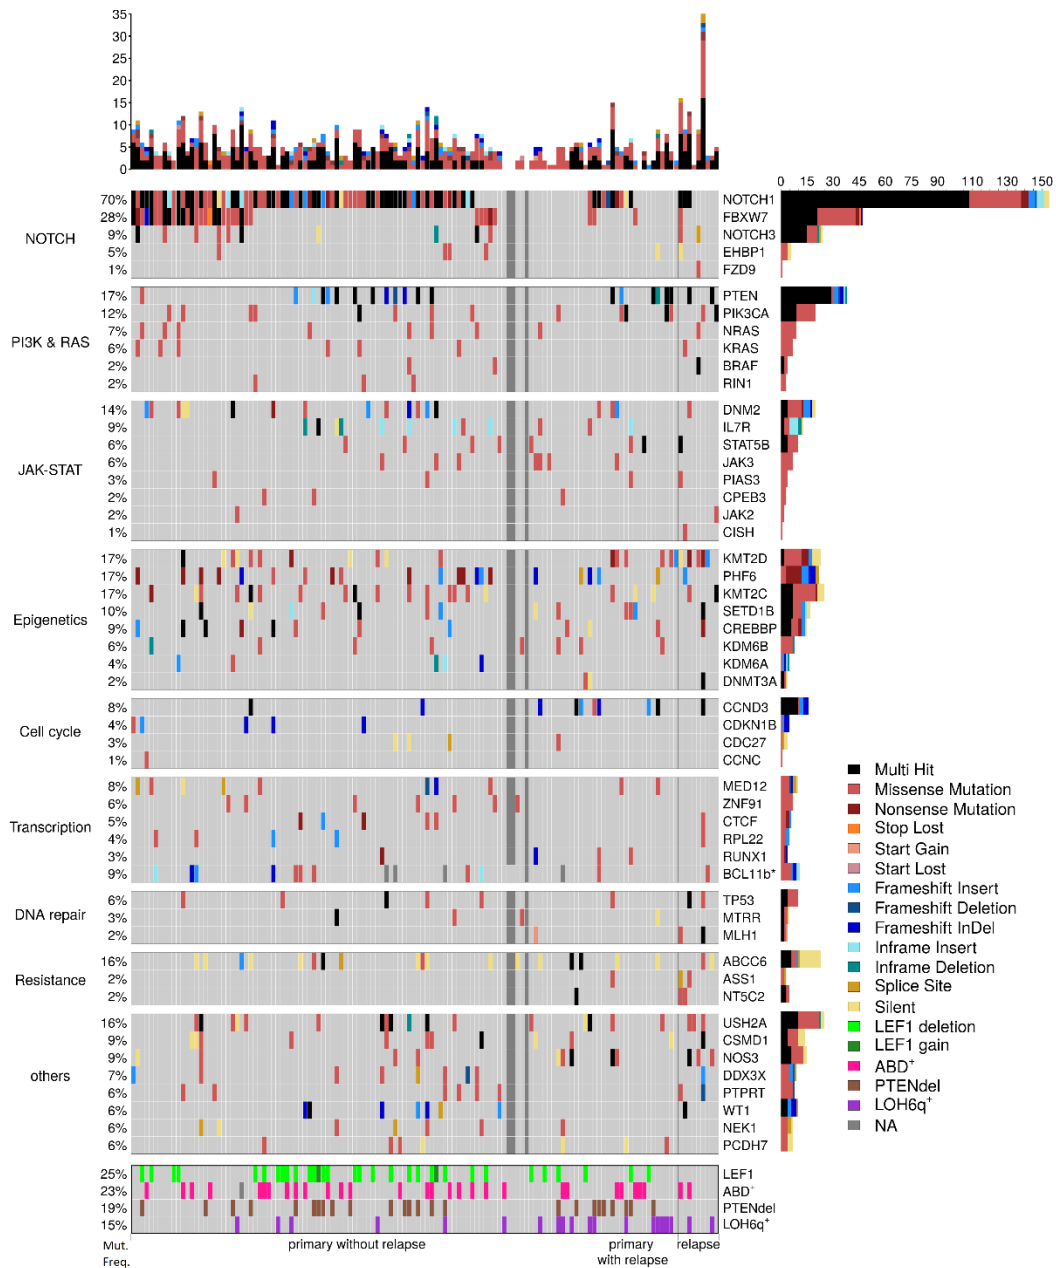

293 is indicated on the left side of the panel. Name of the genes and the type of mutations are  
294 indicated on the right side. The number of mutations identified by targeted sequencing is  
295 displayed at the top of the plot as bar plots. TRG rearrangements (*ABD*), *PTEN* deletions  
296 (*PTENdel*) and LOH6q alterations are displayed in a sub-panel below. Colored boxes on  
297 the right side indicate the type of mutation. (\*) indicates that *BCL11b* was not part of  
298 targeted panel and analyzed by Sanger sequencing. Samples that failed in targeted  
299 sequencing are represented in dark grey boxes.

300

301

302 **Supplemental Figure 3. Overview of differential methylation between different**  
 303 **samples from the “limited cohort”**

304

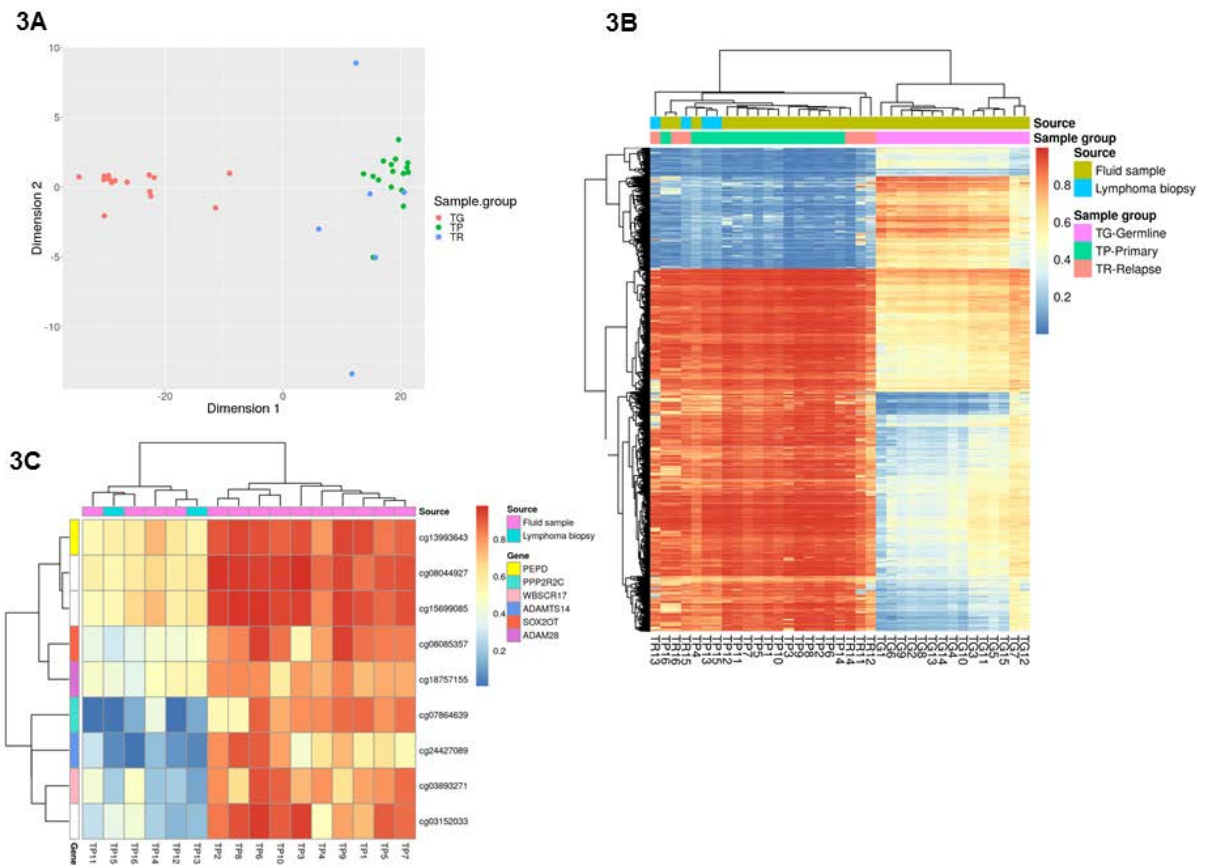

305

306

307 **Supplemental Figure 3. (A)** Non-metric multidimensional scaling (NMDS) analysis  
 308 representing the variation in methylation epigenotypes between samples **(B)** Supervised  
 309 hierarchical clustering conducted using 8045 probes that were significantly differentially  
 310 methylated between germline (TG) and tumor samples (TP- primary and TR-relapse). *p*  
 311 value= $1e^{-12}$ . **(C)** Differential methylated genes between primary samples from relapse(-)  
 312 and relapse(+) cases. *p* value=0.05. Array used: Infinium MethylationEPIC BeadChip  
 313 ‘850K’

314 **Supplemental Figure 4. Schematic display of localization and frequencies of**  
 315 **somatic mutations identified in *NOTCH1* and *FBXW7***

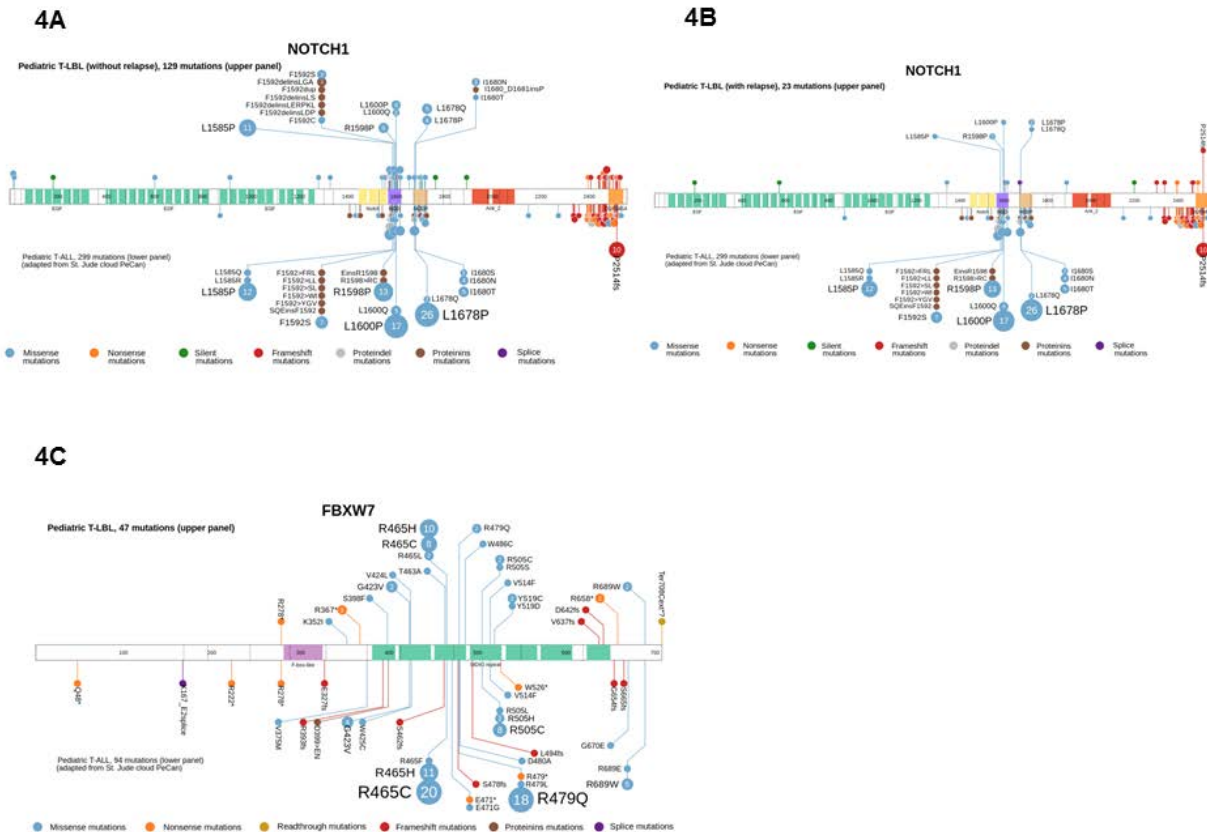

316  
 317 **Supplemental Figure 4. Schematic display of localization and frequencies of somatic**  
 318 **mutations identified for, (A) *NOTCH1* in relapse<sup>-</sup> (B) *NOTCH1* in relapse<sup>+</sup> samples (C)**  
 319 ***FBXW7* in total samples** Note: The data for mutations (4 A-C) from pediatric T-ALL was  
 320 imported from St. Jude Pediatric Cancer Genomic data portal and are displayed at lower  
 321 part of the protein/Gene and mutations identified in current T-LBL project are displayed  
 322 on the upper part of the protein structure.

323

324

325 **Supplemental Figure 5. Schematic display of localization and frequencies of somatic mutations identified in candidate genes**  
 326 **somatic mutations identified in candidate genes**

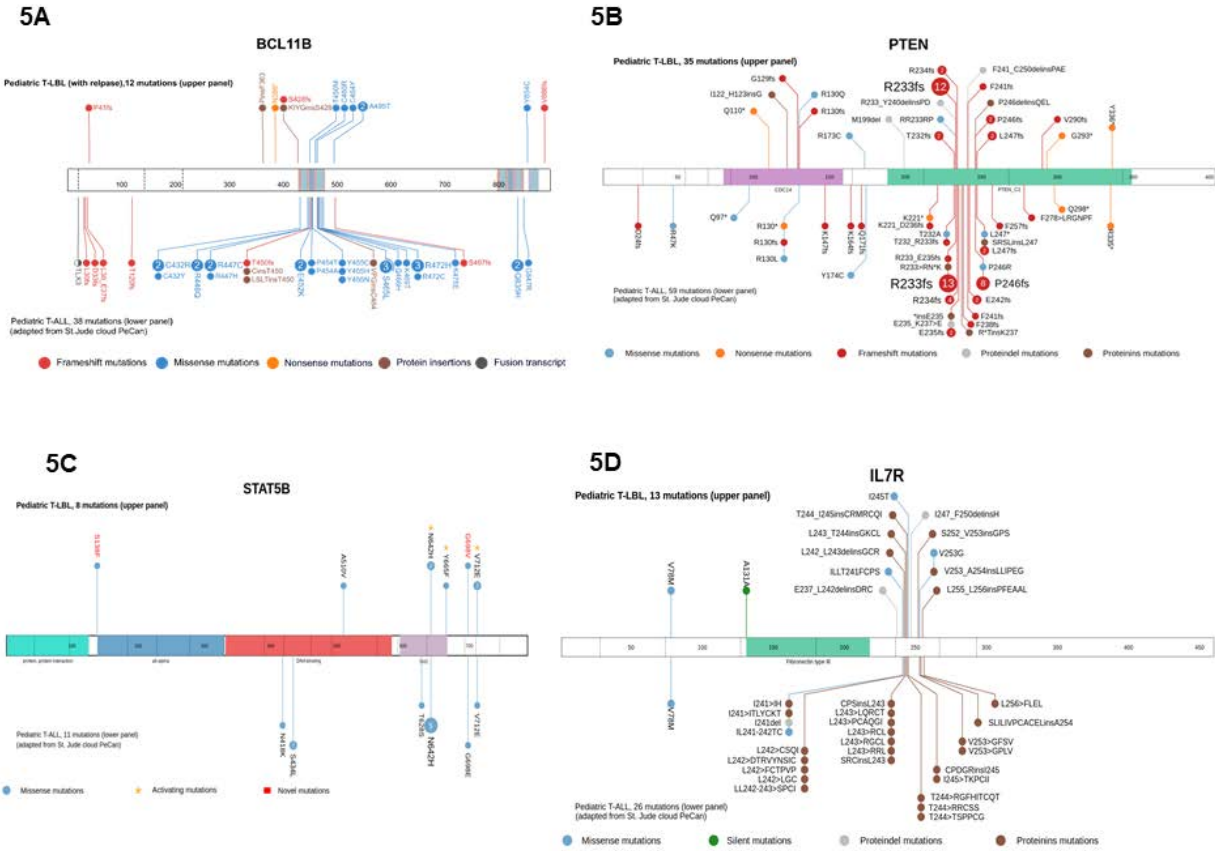

327  
 328 **Supplemental Figure 5. Schematic display of localization and frequencies of somatic**  
 329 **mutations identified for (A) BCL11B (B) PTEN (C) STAT5B (D) IL7R in total samples** Note:  
 330 For figures **(B-D)** the mutations displayed are with VAF cutoff >1%. The data for mutations  
 331 **(5A-D)** from pediatric T-ALL was imported from St. Jude Pediatric Cancer Genomic data  
 332 portal and are displayed at lower part of the protein/Gene and mutations identified in  
 333 current T-LBL project are displayed on the upper part of the protein structure.

335 **Supplemental Figure 6 Gene relation plot**

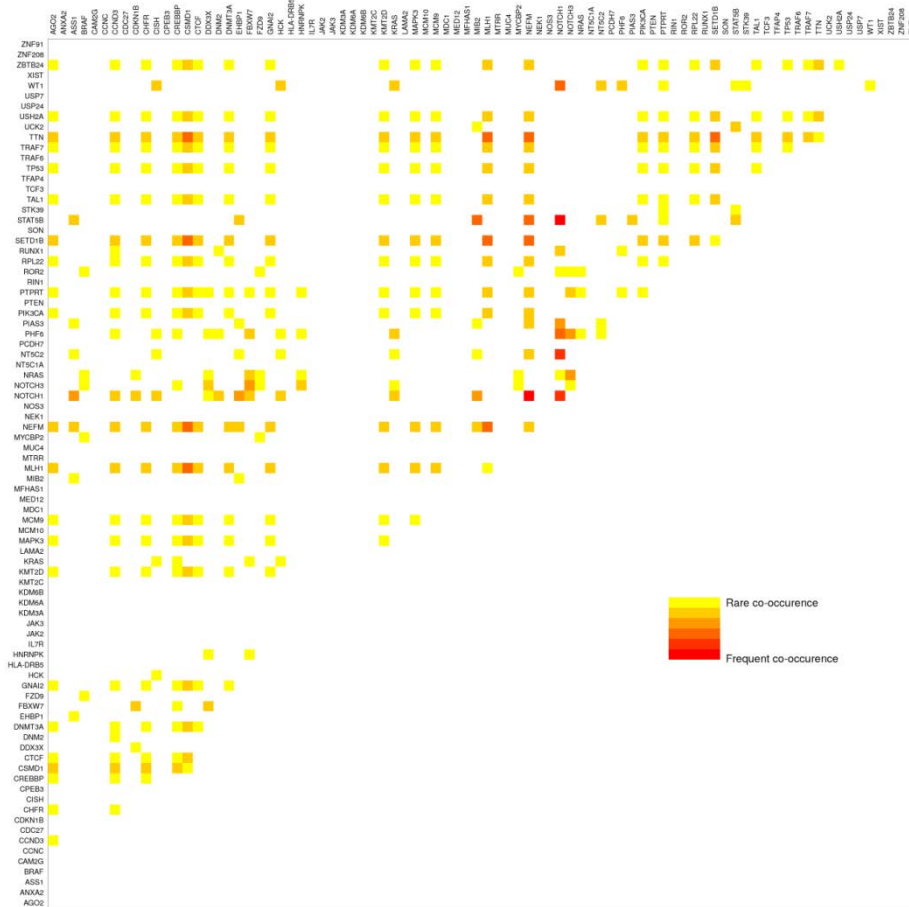

336  
 337 **Figure 6.** Gene relation plot depicting correlation of mutated genes from the targeted  
 338 sequencing.

339

340

341 **Supplemental Figure 7. Five year cumulative incidence of relapse (CIR) for Euro-**  
 342 **LB02 vs extended cohort and previously identified candidate genes**

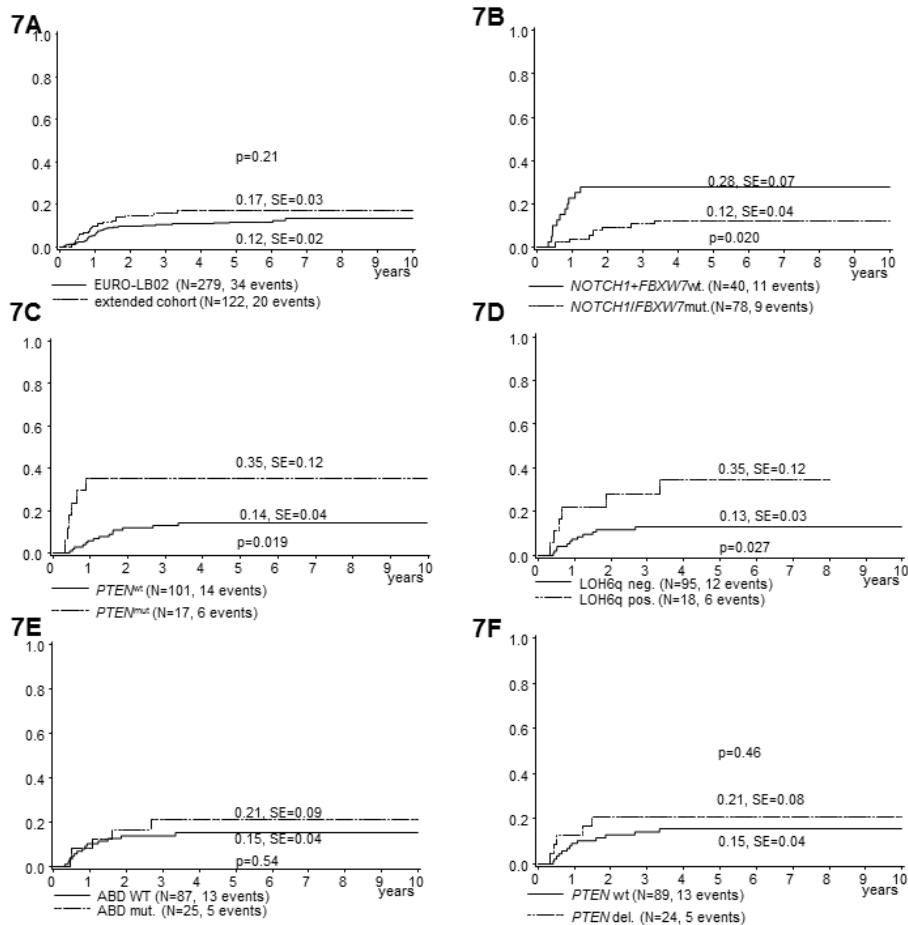

343  
 344  
 345 **Supplemental Figure 7. Five year cumulative incidence of relapse (CIR) for (A) Euro-**  
 346 **LB02 vs extended cohort, (B) NOTCH1 and/or FBXW7 mutational status, (C) PTEN**  
 347 **mutational status, (D) LOH6q status, (E) absence of biallelic T-cell receptor (TCR) deletion**  
 348 **(ABD) status (F) PTENdel status**

349



350 **Supplemental Figure 8. Five year cumulative incidence of relapse (CIR) for newly**  
 351 **identified potential candidate genes**

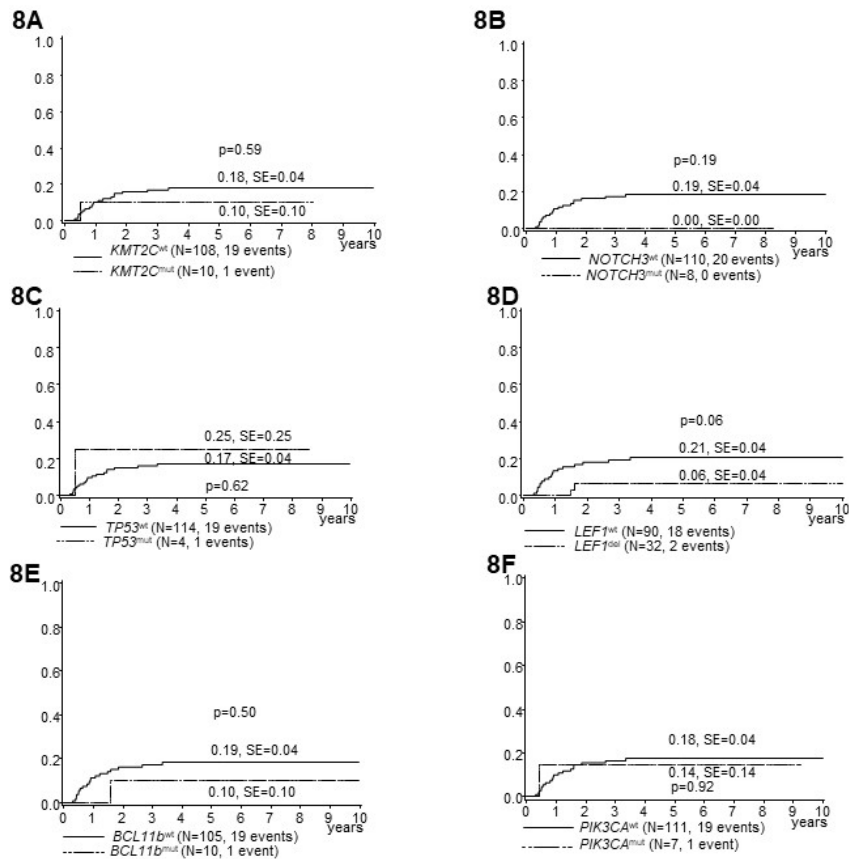

352  
 353  
 354 **Supplemental Figure 8. Five year cumulative incidence of relapse (CIR) for (A) KMT2C**  
 355 **mutational status, (B) NOTCH3 mutational status, (C) TP53 mutational status, (D) LEF1**  
 356 **mutational status, (E) BCL11b mutational status (F) PIK3CA mutational status**

357  
 358  
 359

360 **Supplemental Figure 9. Modelling of *KMT2D* domain structures and comparison**  
361 **with the mutated domain structures.**

362

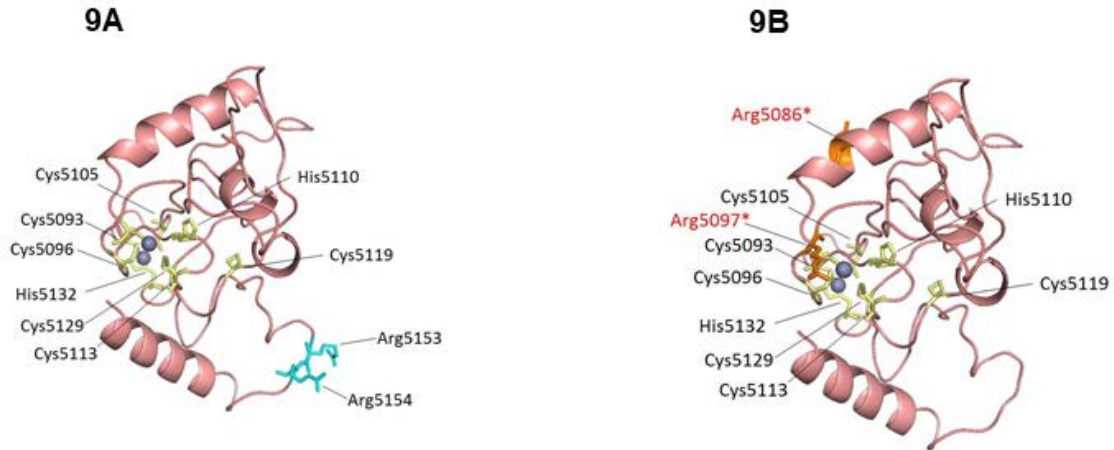

363

364 **Supplemental Figure 9. (A)** Domain structure of PHD<sub>7</sub> of *KMT2D*<sup>wt</sup> was generated using  
365 Phyre2, Cys<sub>4</sub>–His–Cys<sub>3</sub>– His motif is displayed in stick structures (yellow) and two zinc  
366 molecules (purple) were modeled into the structure using PyMOL. The two nonsense  
367 mutations at the respective positions (red) are indicated by (\*). **(B)** Schematic display of  
368 Arginine residues (cyan) at respective positions near PHD<sub>7</sub> of *KMT2D*<sup>wt</sup>. Mutations post  
369 PHD<sub>7</sub> at positions R5153P (cyan) and R5154Q (cyan), the latter identified in T-ALL, are  
370 represented in stick structures.

371

372

373 **Supplemental Figure 10**

374

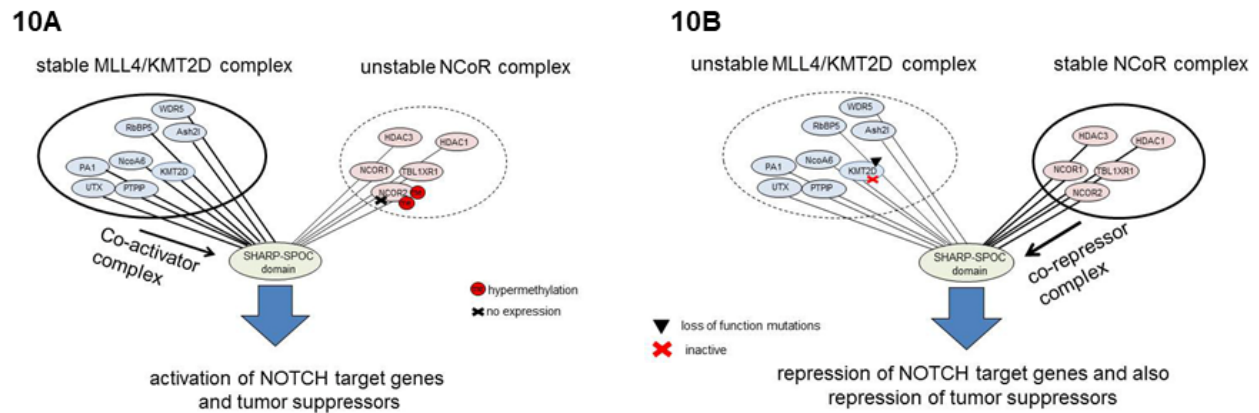

375

376

377 **Supplemental Figure 10. Schematic representation of mechanism of regulation of**  
378 **Notch target genes and altered pathways in pediatric T-LBL**

379 **(A)** Schematic representation of mechanism of regulation of Notch target genes and tumor  
380 suppressors via a dynamic interplay between the *KMT2D* co-activator complex and NCoR  
381 repressor complex. In absence of loss of function mutations for *KMT2D* or post-  
382 translational modification which can inactivate *KMT2D* and in presence of NCoR2  
383 hypermethylation which might result in unstable repressor complex, the *KMT2D* co-  
384 activator complex binds the SHARP protein to activate Notch target genes and tumor  
385 suppressors. **(B)** In case of loss of function mutations in *KMT2D* or post-translational  
386 modification such as phosphorylation which can inactivate *KMT2D* presumably results in  
387 binding of stable repressor complex to the SHARP protein to repress notch target genes  
388 and tumor suppressors. (Figures 4A, 4B adapted from Oswald F, et. al. Nucleic Acids  
389 Research 2016).

390

391 **References**

- 392 1. Reiter A, Schrappe M, Ludwig WD, et al. Intensive ALL-type therapy without local  
393 radiotherapy provides a 90% event-free survival for children with T-cell lymphoblastic  
394 lymphoma: a BFM group report. *Blood*. 2000;95(2):416-421.
- 395 2. Landmann E, Burkhardt B, Zimmermann M, et al. Results and conclusions of the  
396 European Intergroup EURO-LB02 trial in children and adolescents with lymphoblastic  
397 lymphoma. *Haematologica*. 2017;102(12):2086-2096.
- 398 3. Bonn BR, Rohde M, Zimmermann M, et al. Incidence and prognostic relevance of  
399 genetic variations in T-cell lymphoblastic lymphoma in childhood and adolescence. *Blood*.  
400 2013;121(16):3153-3160.
- 401 4. Liu Y, Easton J, Shao Y, et al. The genomic landscape of pediatric and young adult  
402 T-lineage acute lymphoblastic leukemia. *Nat Genet*. 2017;49(8):1211-1218.
- 403 5. Ma X, Liu Y, Liu Y, et al. Pan-cancer genome and transcriptome analyses of 1,699  
404 paediatric leukaemias and solid tumours. *Nature*. 2018;555(7696):371-376.
- 405 6. Kraszewska MD, Dawidowska M, Kosmalka M, et al. BCL11B, FLT3, NOTCH1  
406 and FBXW7 mutation status in T-cell acute lymphoblastic leukemia patients (vol 50, pg  
407 33, 2013). *Blood Cells Molecules and Diseases*. 2013;51(1):66-68.
- 408 7. De Keersmaecker K, Real PJ, Della Gatta G, et al. The TLX1 oncogene drives  
409 aneuploidy in T cell transformation. *Nature Medicine*. 2010;16(11):1321-+.
- 410 8. Larson DE, Harris CC, Chen K, et al. SomaticSniper: identification of somatic point  
411 mutations in whole genome sequencing data. *Bioinformatics*. 2012;28(3):311-317.
- 412 9. Saunders CT, Wong WS, Swamy S, Becq J, Murray LJ, Cheetham RK. Strelka:  
413 accurate somatic small-variant calling from sequenced tumor-normal sample pairs.  
414 *Bioinformatics*. 2012;28(14):1811-1817.

- 415 10. Roberts ND, Kortschak RD, Parker WT, et al. A comparative analysis of algorithms  
416 for somatic SNV detection in cancer. *Bioinformatics*. 2013;29(18):2223-2230.
- 417 11. Xu H, DiCarlo J, Satya RV, Peng Q, Wang Y. Comparison of somatic mutation  
418 calling methods in amplicon and whole exome sequence data. *BMC Genomics*.  
419 2014;15:244.
- 420 12. Cingolani P, Platts A, Wang le L, et al. A program for annotating and predicting the  
421 effects of single nucleotide polymorphisms, SnpEff: SNPs in the genome of *Drosophila*  
422 *melanogaster* strain w1118; iso-2; iso-3. *Fly (Austin)*. 2012;6(2):80-92.
- 423 13. Lek M, Karczewski KJ, Minikel EV, et al. Analysis of protein-coding genetic  
424 variation in 60,706 humans. *Nature*. 2016;536(7616):285-291.
- 425 14. Sherry ST, Ward MH, Kholodov M, et al. dbSNP: the NCBI database of genetic  
426 variation. *Nucleic Acids Res*. 2001;29(1):308-311.
- 427 15. Landrum MJ, Lee JM, Benson M, et al. ClinVar: public archive of interpretations of  
428 clinically relevant variants. *Nucleic Acids Res*. 2016;44(D1):D862-868.
- 429 16. Forbes SA, Beare D, Gunasekaran P, et al. COSMIC: exploring the world's  
430 knowledge of somatic mutations in human cancer. *Nucleic Acids Res*. 2015;43(Database  
431 issue):D805-811.
- 432 17. Sandmann S, Karimi M, de Graaf AO, et al. appreci8: a pipeline for precise variant  
433 calling integrating 8 tools. *Bioinformatics*. 2018;34(24):4205-4212.
- 434 18. Zhou W, Laird PW, Shen H. Comprehensive characterization, annotation and  
435 innovative use of Infinium DNA methylation BeadChip probes. *Nucleic Acids Res*.  
436 2017;45(4):e22.

- 437 19. Nordlund J, Backlin CL, Wahlberg P, et al. Genome-wide signatures of differential  
438 DNA methylation in pediatric acute lymphoblastic leukemia. *Genome Biol.*  
439 2013;14(9):r105.
- 440 20. Tian Y, Morris TJ, Webster AP, et al. ChAMP: updated methylation analysis  
441 pipeline for Illumina BeadChips. *Bioinformatics.* 2017;33(24):3982-3984.
- 442 21. Teschendorff AE, Widschwendter M. Differential variability improves the  
443 identification of cancer risk markers in DNA methylation studies profiling precursor cancer  
444 lesions. *Bioinformatics.* 2012;28(11):1487-1494.
- 445 22. Ritchie ME, Phipson B, Wu D, et al. limma powers differential expression analyses  
446 for RNA-sequencing and microarray studies. *Nucleic Acids Res.* 2015;43(7):e47.
- 447 23. Rohde M, Bonn BR, Zimmermann M, et al. Multiplex ligation-dependent probe  
448 amplification validates LOH6q analyses and enhances insight into chromosome 6q  
449 aberrations in pediatric T-cell lymphoblastic leukemia and lymphoma. *Leuk Lymphoma.*  
450 2015;56(6):1884-1887.
- 451 24. Derrieux C, Trinquand A, Bruneau J, et al. A Single-Tube, EuroClonality-Inspired,  
452 TRG Clonality Multiplex PCR Aids Management of Patients with Enteropathic Diseases,  
453 including from Formaldehyde-Fixed, Paraffin-Embedded Tissues. *J Mol Diagn.*  
454 2019;21(1):111-122.
- 455
